# Supplementary material for: Inertial Motion Capturing in Ergonomic Workplace Analysis: Assessing the Correlation between RULA, Upper-Body Posture Deviations and Musculoskeletal Discomfort
Source: MDPI journal article supplement (doi:10.3390/safety10010016), 2024-02-02
Supplement: s1 [file s1]

## Supplementary material

**Table S1:** Results (mean and standard deviation) of musculoskeletal discomfort (MD) in production and office workers (R = right side; L = left side)

| Body region | Group    | Mean  | SD    | n  |
|-------------|----------|-------|-------|----|
| Neck        | Industry | 10.42 | 20.59 | 49 |
|             | Office   | 4.53  | 7.46  | 15 |
| ShoulderL   | Industry | 6.11  | 12.68 | 49 |
|             | Office   | 5.00  | 14.84 | 15 |
| ShoulderR   | Industry | 3.14  | 7.93  | 49 |
|             | Office   | 3.50  | 9.91  | 15 |
| Upper Back  | Industry | 8.51  | 18.71 | 49 |
|             | Office   | 4.70  | 14.87 | 15 |
| Upper ArmR  | Industry | 1.51  | 3.83  | 49 |
|             | Office   | 0.00  | 0.00  | 15 |
| Upper ArmL  | Industry | 0.71  | 3.01  | 49 |
|             | Office   | 0.00  | 0.00  | 15 |
| Lower Back  | Industry | 13.92 | 24.36 | 49 |
|             | Office   | 12.73 | 25.28 | 15 |
| ElbowR      | Industry | 3.53  | 15.21 | 49 |
|             | Office   | 0.00  | 0.00  | 15 |
| ElbowL      | Industry | 2.21  | 12.83 | 49 |
|             | Office   | 0.00  | 0.00  | 15 |
| Lower ArmL  | Industry | 0.99  | 3.68  | 49 |
|             | Office   | 0.00  | 0.00  | 15 |
| Lower ArmR  | Industry | 0.85  | 3.50  | 49 |
|             | Office   | 0.00  | 0.00  | 15 |
| WristR      | Industry | 1.53  | 4.99  | 49 |
|             | Office   | 2.47  | 7.56  | 15 |
| WristL      | Industry | 0.58  | 2.25  | 49 |
|             | Office   | 2.47  | 7.56  | 15 |
| HipR        | Industry | 0.79  | 3.14  | 49 |
|             | Office   | 7.37  | 17.22 | 15 |
| HipL        | Industry | 0.12  | 0.51  | 49 |
|             | Office   | 0.90  | 1.97  | 15 |
| Upper LegR  | Industry | 2.17  | 12.74 | 49 |
|             | Office   | 0.53  | 1.41  | 15 |
| Upper LegL  | Industry | 2.08  | 12.75 | 49 |
|             | Office   | 0.00  | 0.00  | 15 |

|                   |          |      |       |    |
|-------------------|----------|------|-------|----|
| <b>KneeR</b>      | Industry | 4.24 | 17.76 | 49 |
|                   | Office   | 0.50 | 1.52  | 15 |
| <b>KneeL</b>      | Industry | 2.20 | 12.74 | 49 |
|                   | Office   | 1.00 | 2.61  | 15 |
| <b>Lower LegR</b> | Industry | 2.46 | 12.77 | 49 |
|                   | Office   | 0.67 | 2.49  | 15 |
| <b>Lower LegL</b> | Industry | 2.59 | 12.85 | 49 |
|                   | Office   | 0.00 | 0.00  | 15 |
| <b>FootR</b>      | Industry | 7.28 | 17.54 | 49 |
|                   | Office   | 5.43 | 15.40 | 15 |
| <b>FootL</b>      | Industry | 6.92 | 17.46 | 49 |
|                   | Office   | 6.37 | 15.47 | 15 |

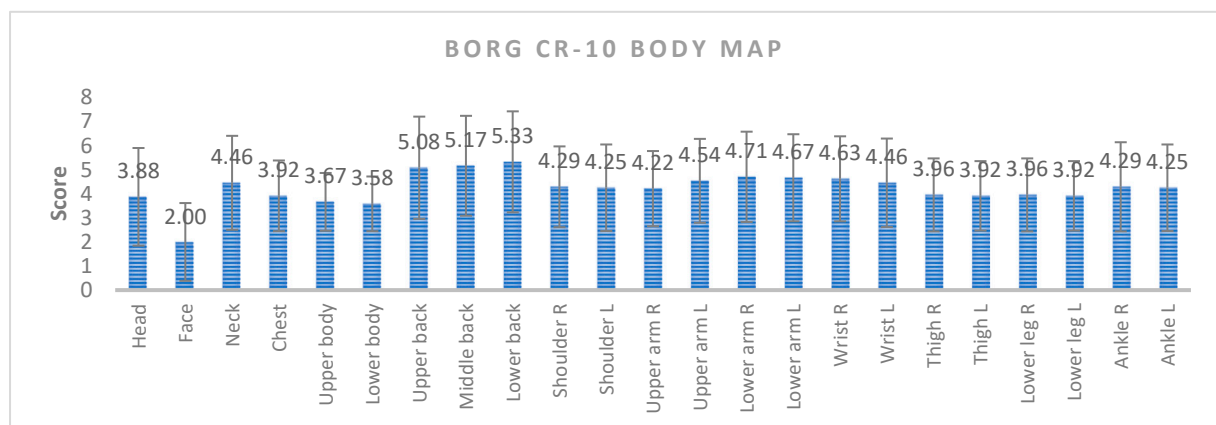

**Figure S1:** Mean and standard deviation of subjective physical exhaustion (Borg CR-10 body map) of 24 participants after MoCap.

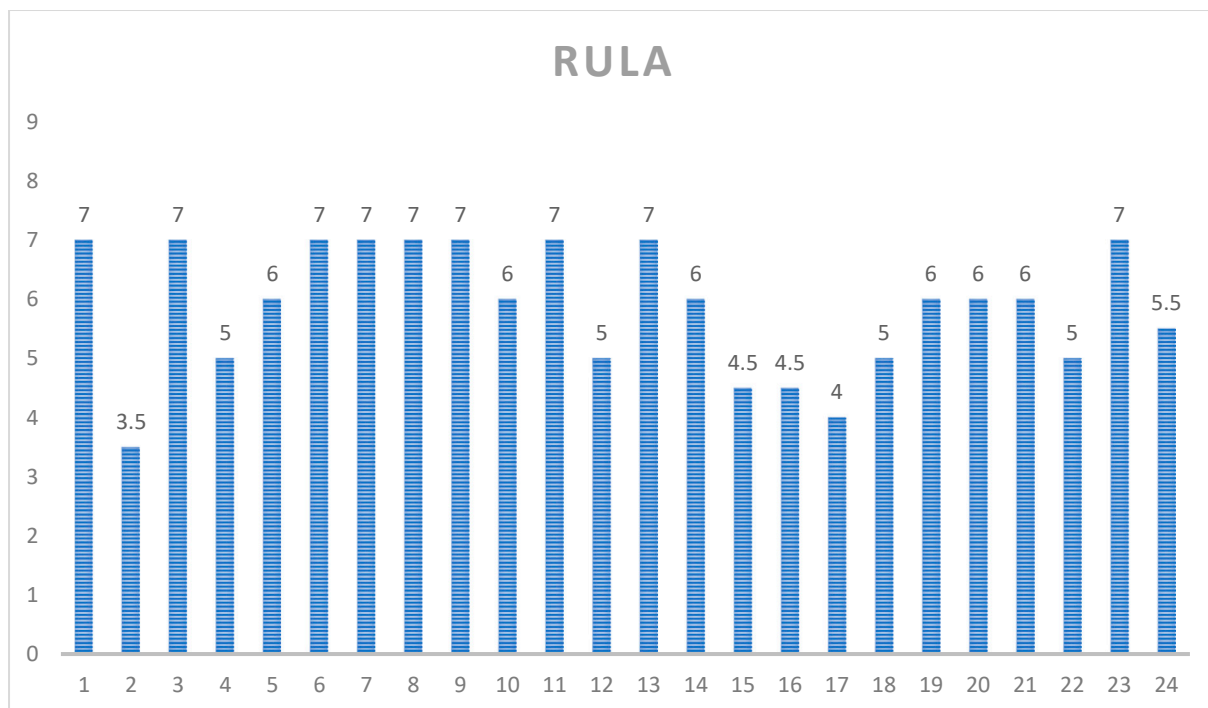

**Figure S2:** Absolute final RULA scores: participant numbers 1-18 = production workers; participant numbers 19-24 = office workers of sample including 30 minutes of MoCap. RULA-score interpretation: 1-2: “acceptable”; 3-4: “measures should be initiated in the near future”; 5-6: “measures should be initiated shortly”; 7: “measures should be initiated immediately”.

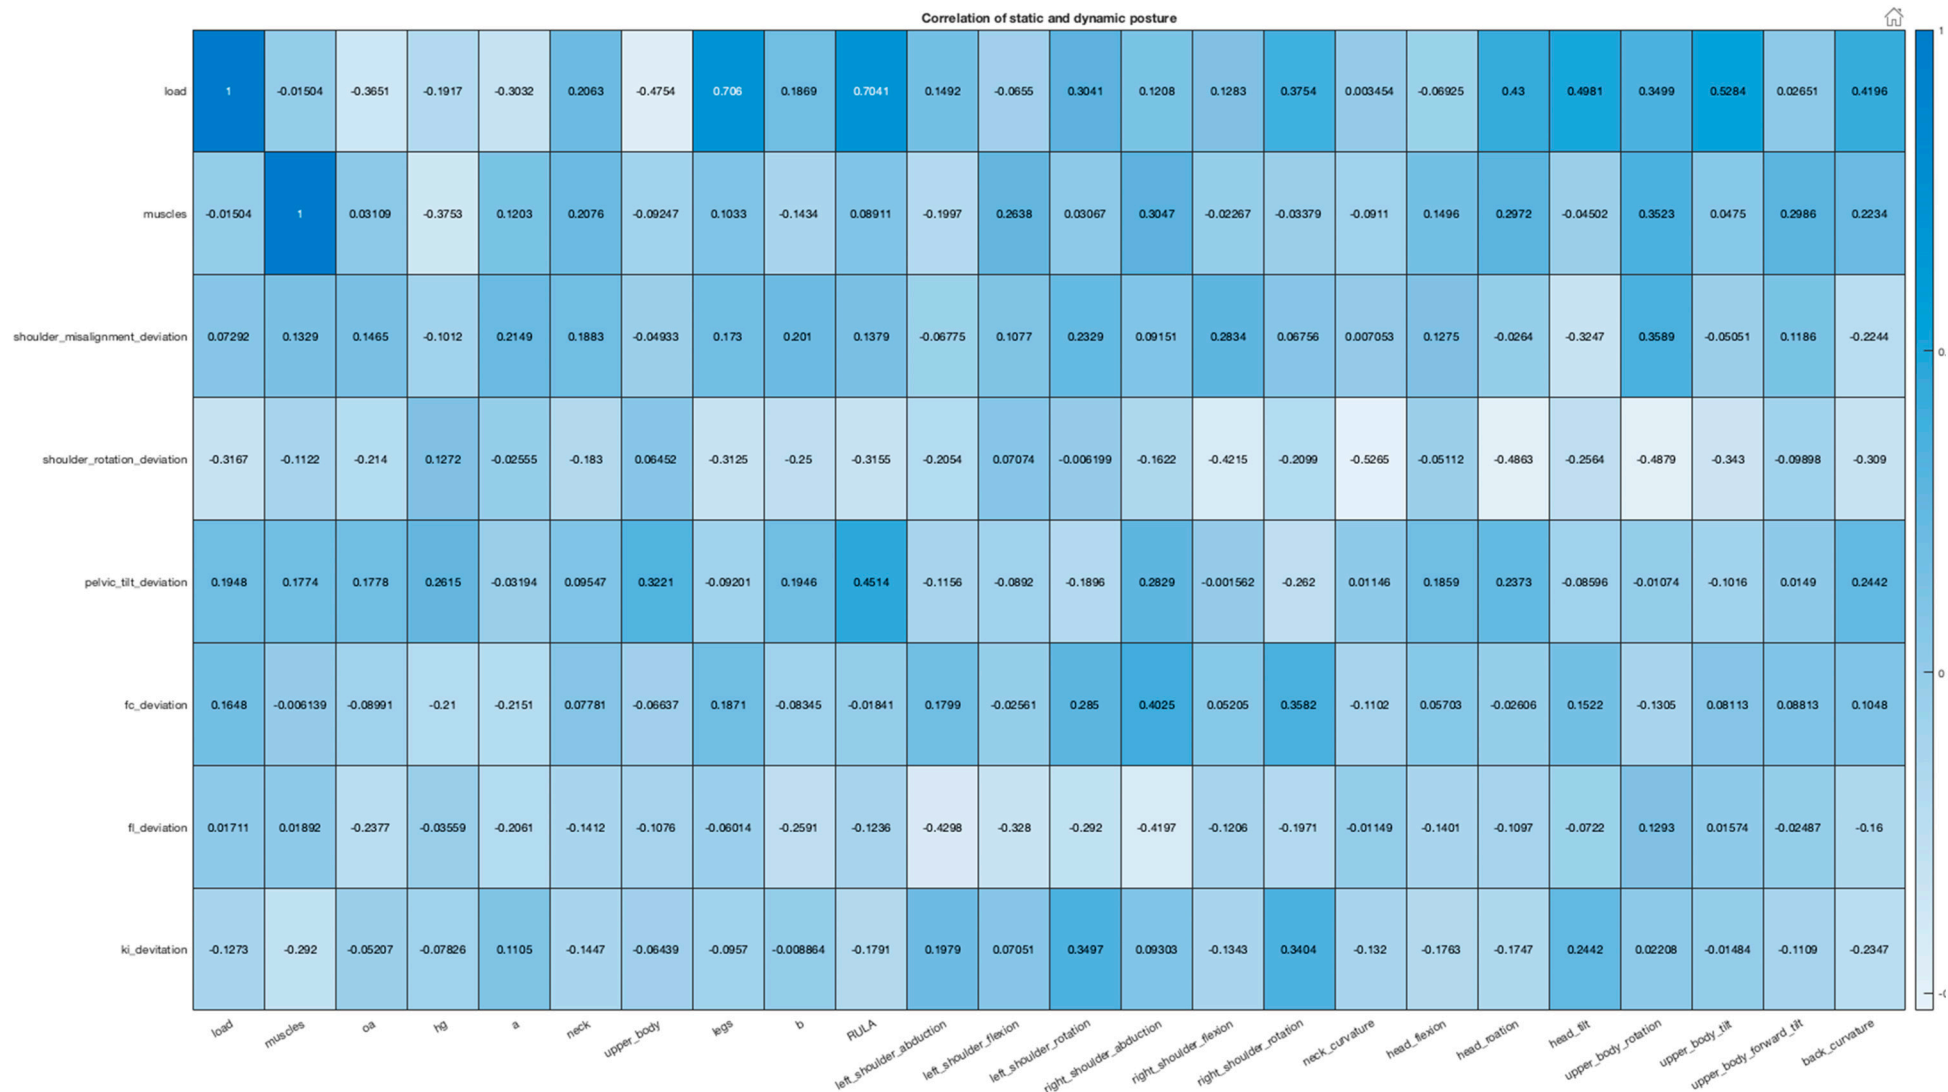

**Figure S3:** Pearson correlation coefficients ( $r$ ) between static posture values (differences from reference values [17,19], Y-axis) and RULA scores (X-axis).

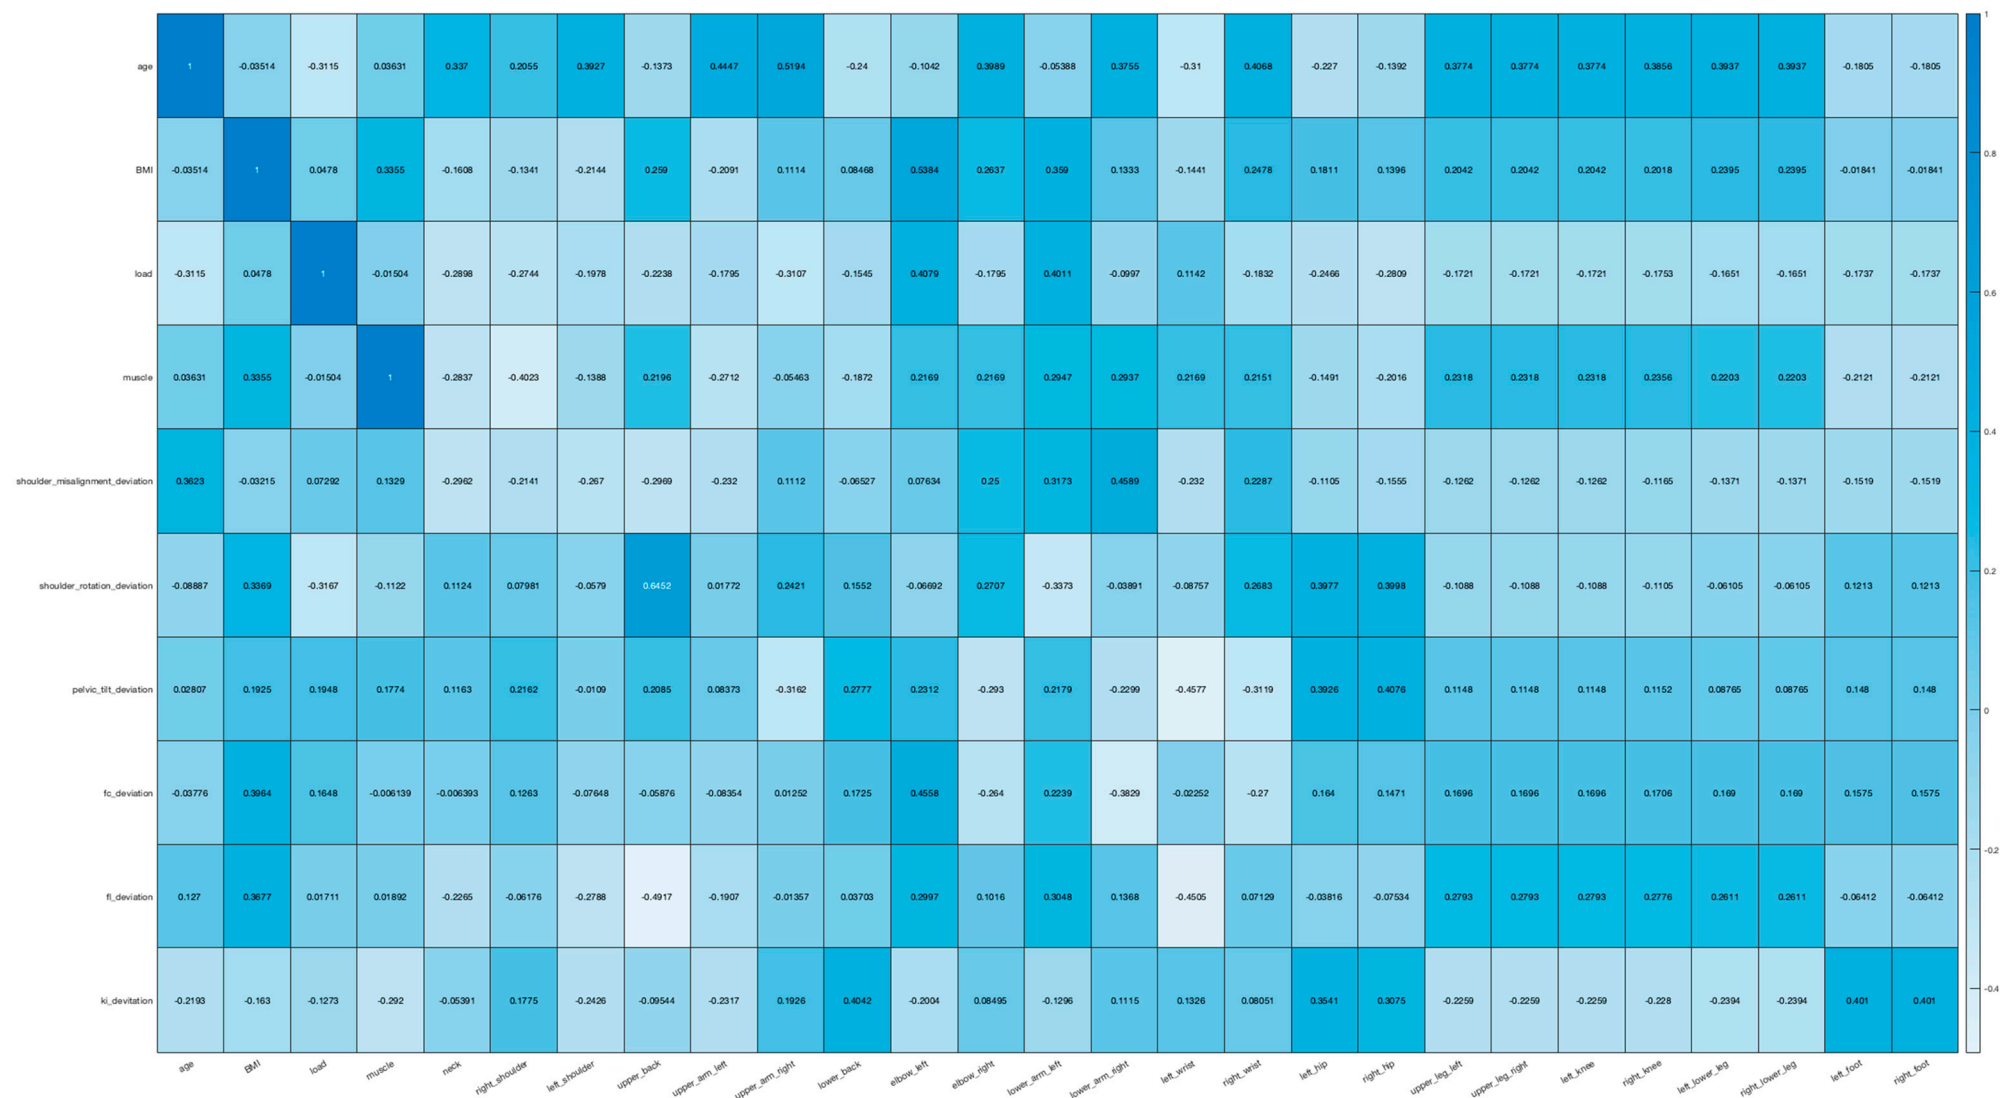

**Figure S4:** Correlation coefficients between static posture values (deviations from reference values [17,19]; ; Y-axis) and musculoskeletal discomfort (MD) (X-axis).

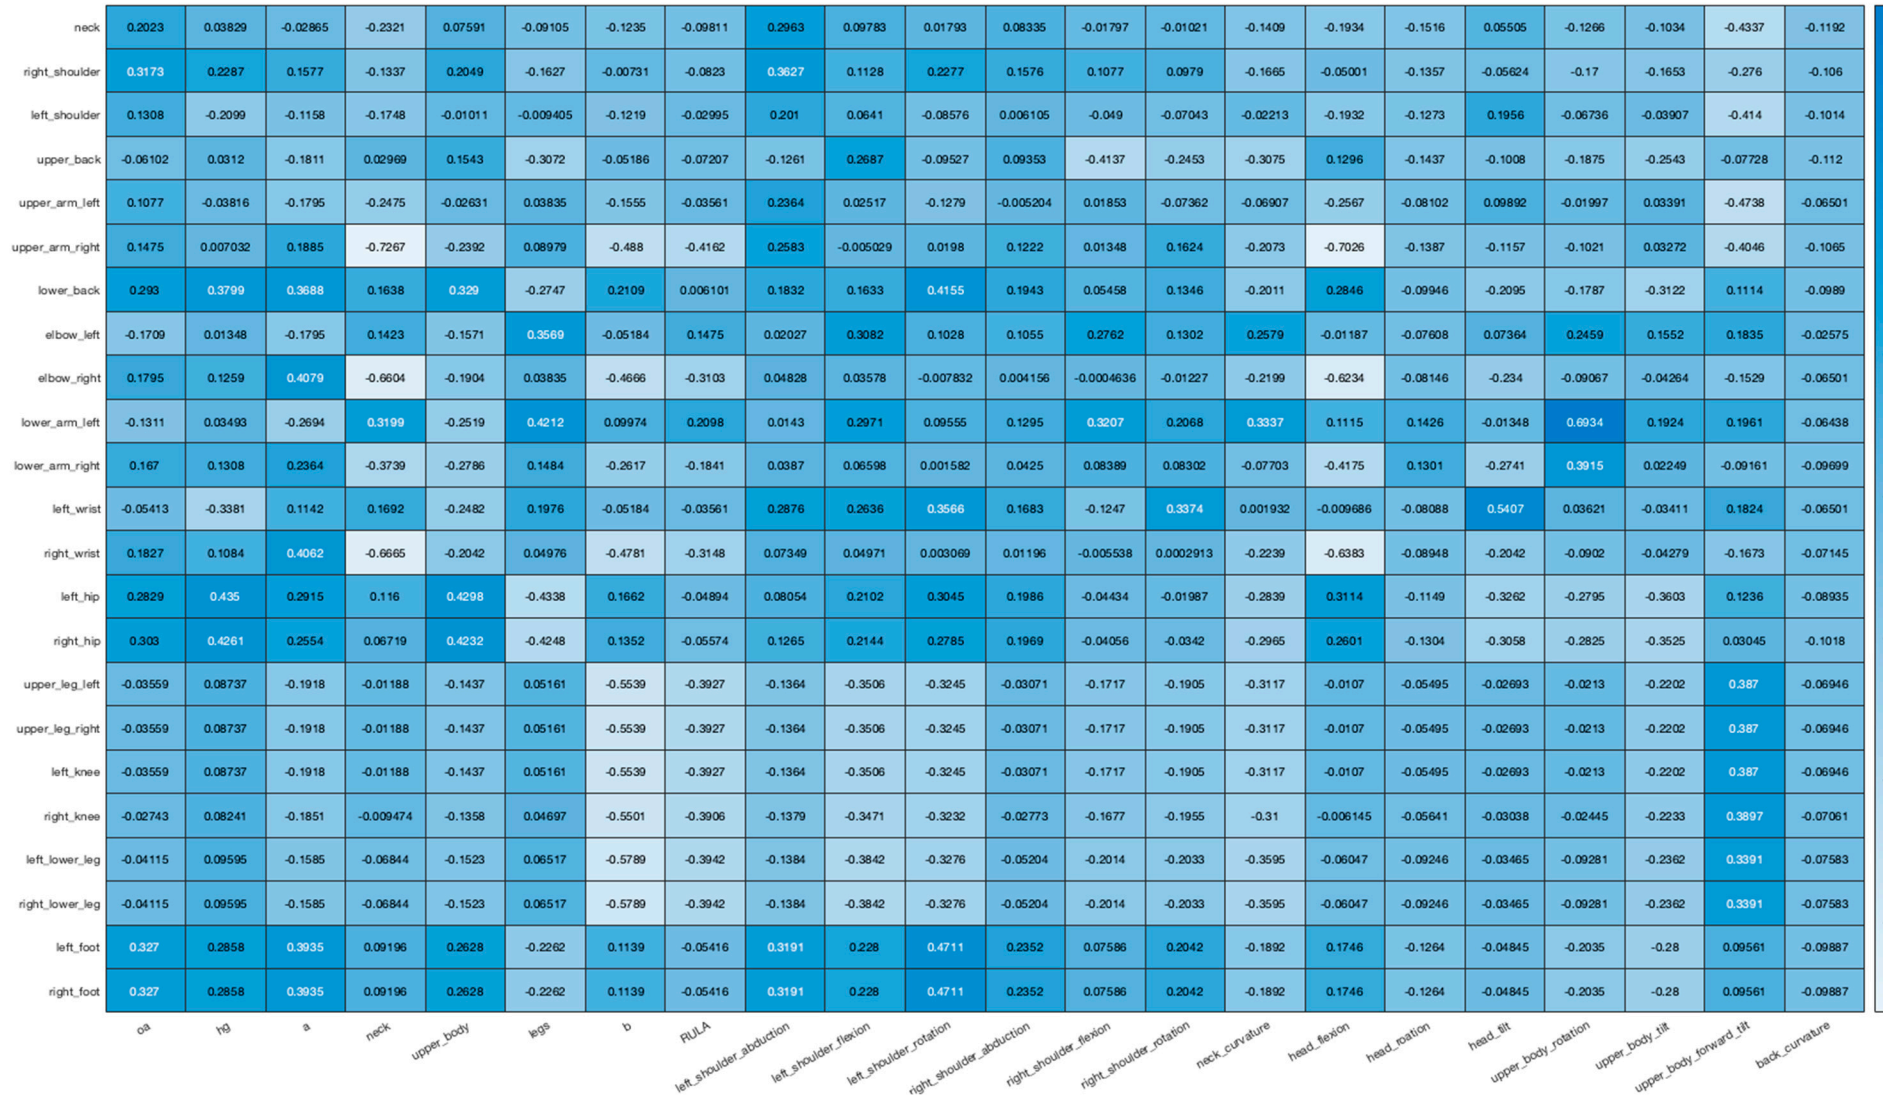

**Figure S5:** Correlation coefficients between musculoskeletal discomfort (MD) (Y-axis) and RULA (X-axis).
